# Supplementary material for: Radial and Circumferential Collagen Fibers Are a Feature of the Peripapillary Sclera of Human, Monkey, Pig, Cow, Goat, and Sheep
Source: PubMed Central journal article supplement — Invest Ophthalmol Vis Sci. 2018 Oct;59(12):4763–74. doi: 10.1167/iovs.18-25025 (PMC6166897; doi:10.1167/iovs.18-25025), 2018-10
Supplement: iovs-59-11-16_s01.pdf [file iovs-59-11-16_s01.pdf]

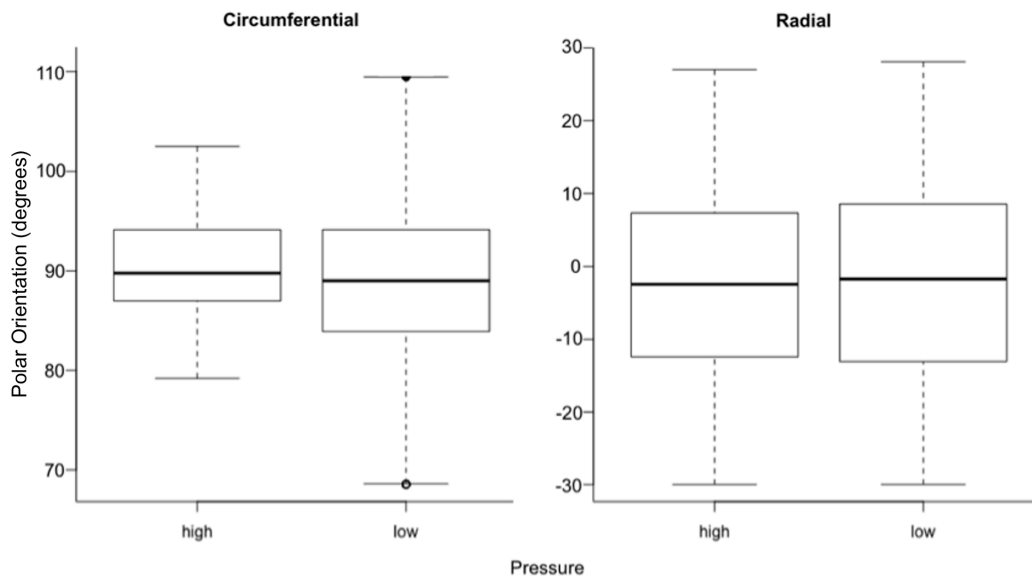

Supplementary Figure 1. Effects of IOP on the distribution of polar orientations in circumferential and radial regions. Analysis was done on single sections from two sheep eyes, with the selected sections being comparable in depth. Note that these are plots of local fiber orientation, and therefore anisotropy is visible in a wider spread. The higher IOP (50 mmHg) reduced the anisotropy in the circumferential regions, but did not affect the radial regions or the median orientation.
